# Supplementary material for: Stomatal Development and Patterning Are Regulated by Environmentally Responsive Mitogen-Activated Protein Kinases inArabidopsis
Source: Oxford University Press journal article supplement (doi:10.1105/tpc.106.048298), 2007-01-01
Supplement: plcell_v19_1_63_s1.zip [file plcell_v19_1_63_s1.zip]

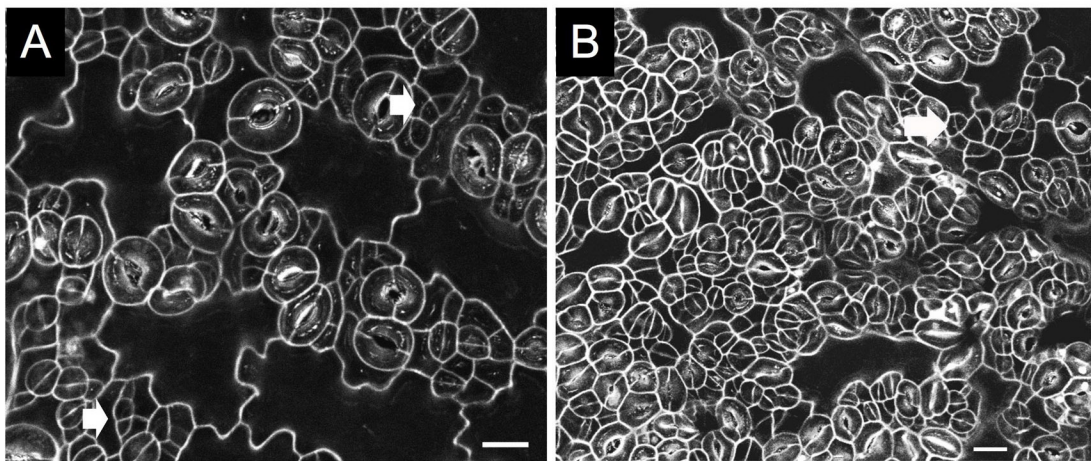

**Supplemental Figure 4. Stomata in clusters are formed sequentially and iteratively.** Confocal image of the abaxial cotyledon epidermis of *MKK4-MKK5RNAi* transgenic seedlings. **A** and **B**, two different transgenic seedlings. Clustered stomata are often oriented in different angles and differ in sizes. White arrows highlight the putative ectopic asymmetric cell divisions. Scale bar, 10 μm.
