# Supplementary material for: Stomatal Development and Patterning Are Regulated by Environmentally Responsive Mitogen-Activated Protein Kinases inArabidopsis
Source: Oxford University Press journal article supplement (doi:10.1105/tpc.106.048298), 2007-01-01
Supplement: plcell_v19_1_63_s1.zip [file plcell_v19_1_63_s1.zip]

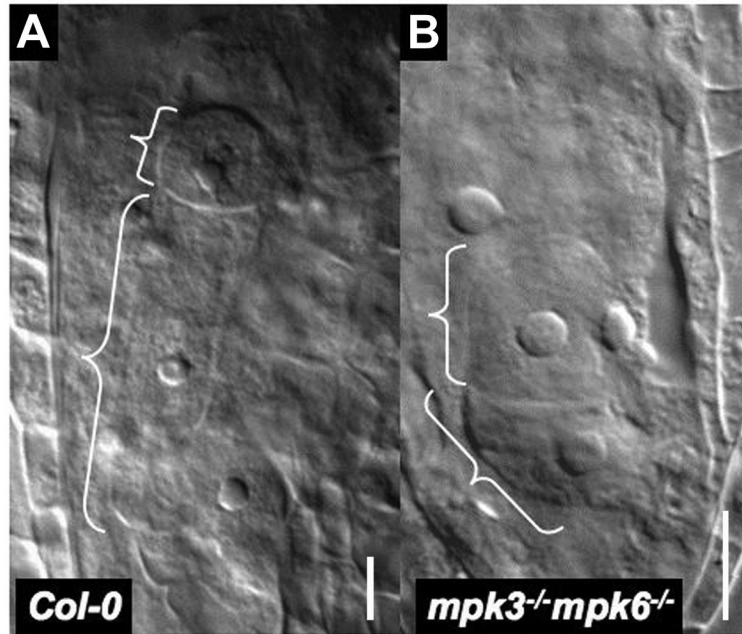

**Supplemental Figure 5. MAPK cascade regulates the asymmetric cell division in the zygote.** Normarski images of cleared whole mount *Wt* (**A**) and *mpk3<sup>-/-</sup>mpk6<sup>-/-</sup>* embryos (**B**) at the one-cell stage. The apical cell and basal cell are highlighted by single brace. The apical cell in *Wt* embryo is much smaller than the basal cell. The apical cell and basal cell are about equal size in the *mpk3<sup>-/-</sup>mpk6<sup>-/-</sup>* embryo. Scale bar, 10  $\mu$ m.
