# Supplementary material for: Stomatal Development and Patterning Are Regulated by Environmentally Responsive Mitogen-Activated Protein Kinases inArabidopsis
Source: Oxford University Press journal article supplement (doi:10.1105/tpc.106.048298), 2007-01-01
Supplement: plcell_v19_1_63_s1.zip [file plcell_v19_1_63_s1.zip]

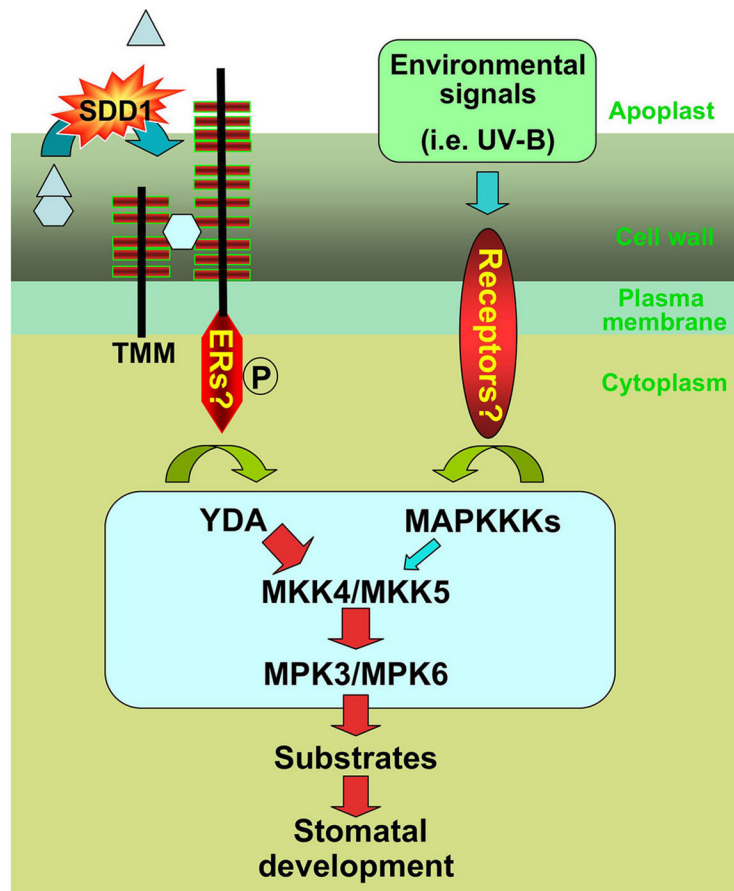

**Supplemental Figure 6. A model depicts the function of YDA-MKK4/MKK5-MPK3/MPK6 in stomatal development.** YDA was shown to function downstream of TMM. It is tempting to propose that YDA-MKK4/MKK5-MPK3/MPK6 functions downstream of SDD1, TMM, ER, ERL1, and ERL2 in regulating position-dependent intercellular signaling during stomatal development and patterning. Putative ligands processed by SDD1 activate TMM, together with ERECTA and its paralogs (ERLs), which then activate the YDA-MKK4/MKK5-MPK3/MPK6 cascade that regulates multiple steps of stomatal development and patterning. Environmental signals may impinge on the MKK4/MKK5-MPK3/MPK6 module and fine-tune the development of stomata.
