# Supplementary material for: Stomatal Development and Patterning Are Regulated by Environmentally Responsive Mitogen-Activated Protein Kinases inArabidopsis
Source: Oxford University Press journal article supplement (doi:10.1105/tpc.106.048298), 2007-01-01
Supplement: plcell_v19_1_63_s1.zip [file plcell_v19_1_63_s1.zip]

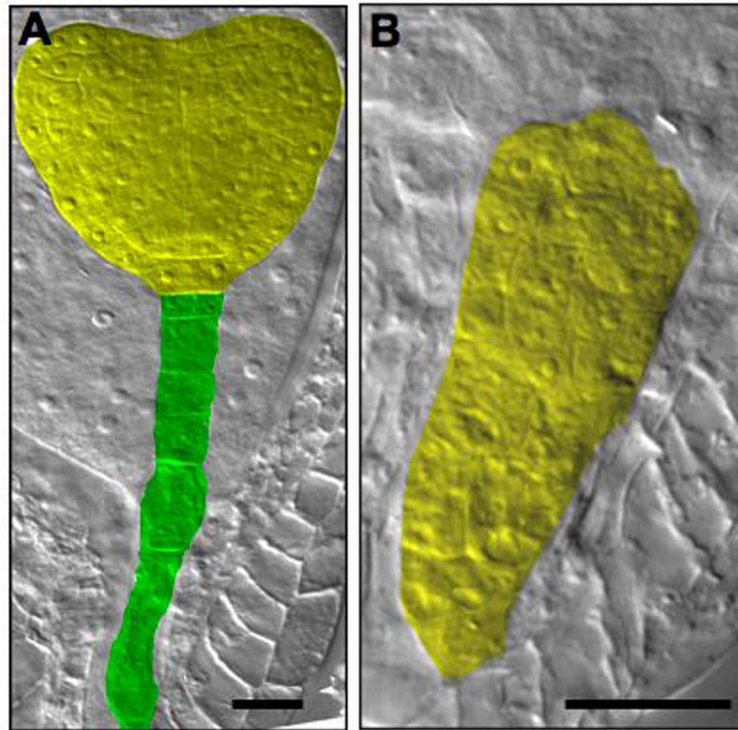

**Supplemental Figure 1. Double mutant of *mpk3*<sup>-/-</sup>*mpk6*<sup>-/-</sup> is embryo lethal.** Nomarski images of cleared whole mount wildtype (**A**) and *mpk3*<sup>-/-</sup>*mpk6*<sup>-/-</sup> embryos (**B**) at late heart stage. The wildtype embryo has an organized linear cell file of the suspensor (false-colored as green). In the *mpk3*<sup>-/-</sup>*mpk6*<sup>-/-</sup> embryo (false-colored as yellow), cells are disorganized with no visible suspensor. Scale bar, 10µm.
