# Supplementary material for: Stomatal Development and Patterning Are Regulated by Environmentally Responsive Mitogen-Activated Protein Kinases inArabidopsis
Source: Oxford University Press journal article supplement (doi:10.1105/tpc.106.048298), 2007-01-01
Supplement: plcell_v19_1_63_s1.zip [file plcell_v19_1_63_s1.zip]

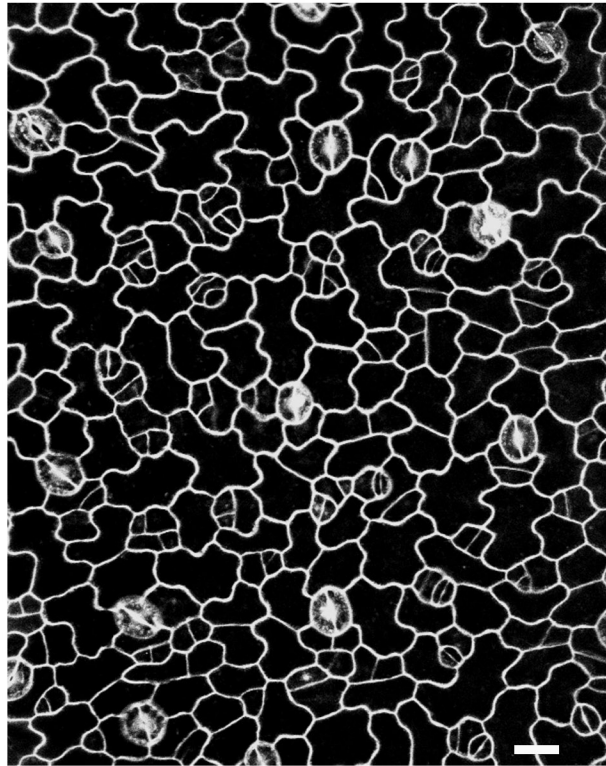

**Supplemental Figure 3. Dex treatment has no effect on stomatal development and patterning.** Confocal images of the abaxial cotyledon epidermis of Dex-inducible *GVG* empty vector transgenic seedlings (treated with 0.02  $\mu$ M Dex). Stomatal distribution follows the one-cell spacing rule. Scale bar, 10  $\mu$ m.
