# Supplementary material for: Stomatal Development and Patterning Are Regulated by Environmentally Responsive Mitogen-Activated Protein Kinases inArabidopsis
Source: Oxford University Press journal article supplement (doi:10.1105/tpc.106.048298), 2007-01-01
Supplement: plcell_v19_1_63_s1.zip [file plcell_v19_1_63_s1.zip]

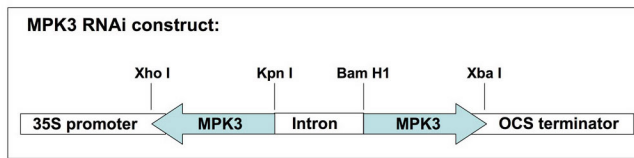

MPK3-F/Bam H1: ggatccATGAACACCGGCGGT  
 1 15  
 MPK3-B/Xba I: tctagaCTCCATAAAGATACAACC  
 693 676  
 MPK3-F/Kpn I: ggtaccATGAACACCGGCGGT  
 MMPK3-B/Xho I: ctcgagCTCCATAAAGATACAACC  
 693 676

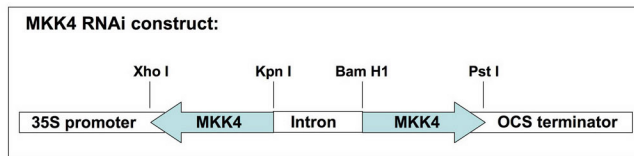

MKK4-F/Bam H1: ggatccATGAGACCGATTCAATCGC  
 1 19  
 MKK4-B/Pst I: ctgcagATAGTCTGAGCCAAGATCC  
 674 656  
 MKK4-F/Kpn I: ggtaccATGAGACCGATTCAATCGC  
 MKK4-B/Xho I: ctcgagATAGTCTGAGCCAAGATCC  
 674 656

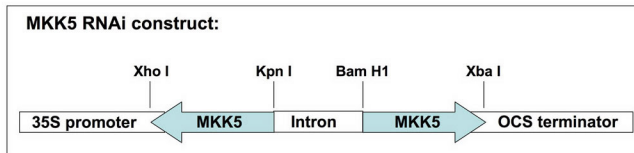

MKK5-F/Bam H1: ggatccATGAAACCGATTCAATCTCCTT  
 1 22  
 MKK5-B/Xba I: tctagaATTGTTTGTGCCAAGATCCTA  
 647 627  
 MKK5-F/Kpn I: ggtaccATGAAACCGATTCAATCTCCTT  
 MKK5-B/Xho I: ctcgagATTGTTTGTGCCAAGATCCTA  
 647 627

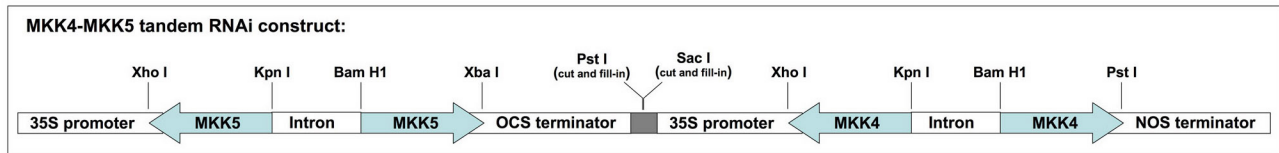

## Supplemental Figure 7. Maps of RNAi and Dex-inducible constructs.

Information on restriction enzyme sites and position of primers used are included.
