# Supplementary material for: Stomatal Development and Patterning Are Regulated by Environmentally Responsive Mitogen-Activated Protein Kinases inArabidopsis
Source: Oxford University Press journal article supplement (doi:10.1105/tpc.106.048298), 2007-01-01
Supplement: plcell_v19_1_63_s1.zip [file plcell_v19_1_63_s1.zip]

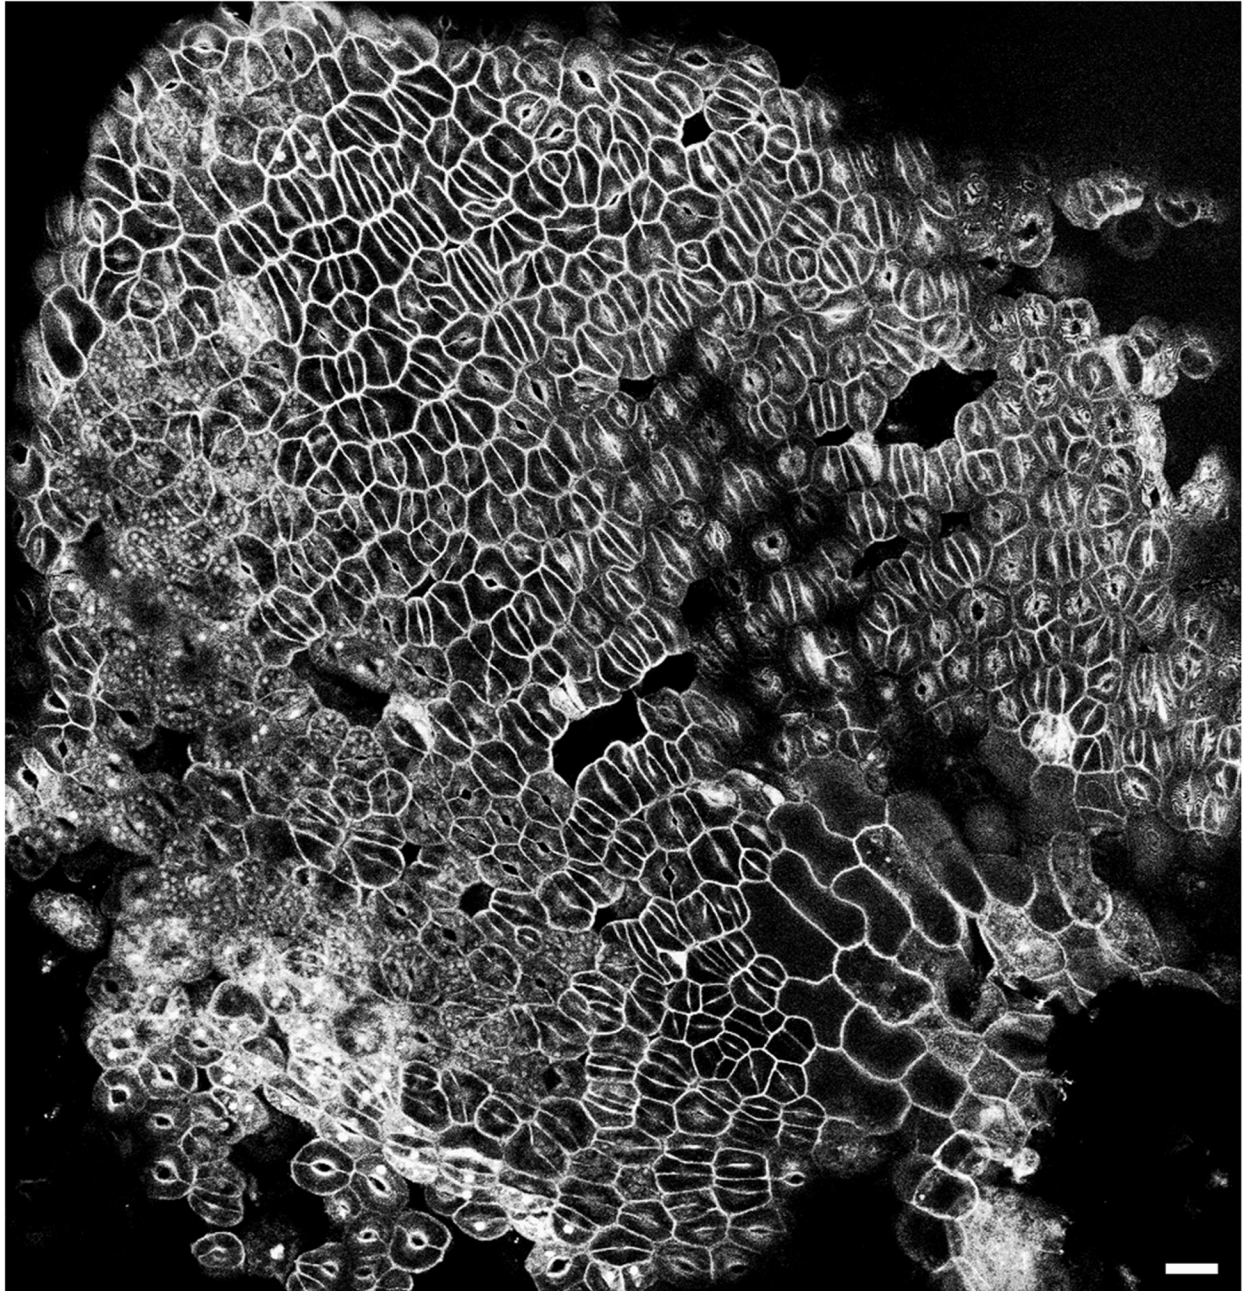

**Supplemental Figure 2. Whole cotyledon epidermis of tandem *MKK4-MKK5RNAi* transgenic plants.** Confocal images of the abaxial epidermis of developing cotyledons. Cell outlines were visualized with propidium iodide (PI) staining. No jigsaw-puzzle like pavement cells are present. Scale bar, 10  $\mu$ m.
